# Supplementary material for: Structural insight into the ligand binding mechanism of aryl hydrocarbon receptor
Source: PubMed Central journal article supplement (PMC9585082; doi:10.1038/s41467-022-33858-w), 2022-10-20
Supplement: 41467_2022_33858_MOESM1_ESM.pdf [file 41467_2022_33858_MOESM1_ESM.pdf]

## **Supplementary Information**

# **Structural insight into the ligand binding mechanism of aryl hydrocarbon receptor**

Shuyan Dai<sup>1</sup>, Lingzhi Qu<sup>1</sup>, Jun Li<sup>2</sup>, Ye Zhang<sup>1</sup>, Longying Jiang<sup>1</sup>, Hudie Wei<sup>1</sup>, Ming Guo<sup>1</sup>, Xiaojuan Chen<sup>1</sup>, Yongheng Chen<sup>1\*</sup>

1 Department of Oncology, NHC Key Laboratory of Cancer Proteomics & State Local Joint Engineering Laboratory for Anticancer Drugs, National Clinical Research Center for Geriatric Disorders, Xiangya Hospital, Central South University, Changsha, Hunan, 410008, China

2 Institute of Clinical Medicine, The First Affiliated Hospital of University of South China, Hengyang, Hunan 421001, China

\*Correspondence, yonghenc@163.com (Y.C.)

## **Content:**

**Supplementary Fig. 1-7**

**Supplementary Table 1**

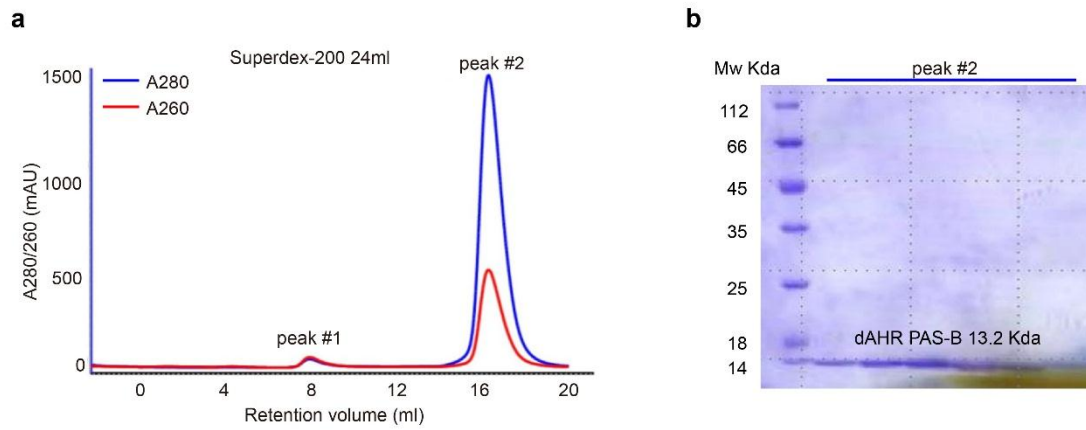

**Supplementary Fig. 1 Recombinant expression and purification of dAHR PAS-B domain.** **a** SEC profile of purified dAHR PAS-B. **b** SDS-PAGE analysis of dAHR PAS-B. These results are representative of at least three independent experiments. Source data are provided as a Source Data file.

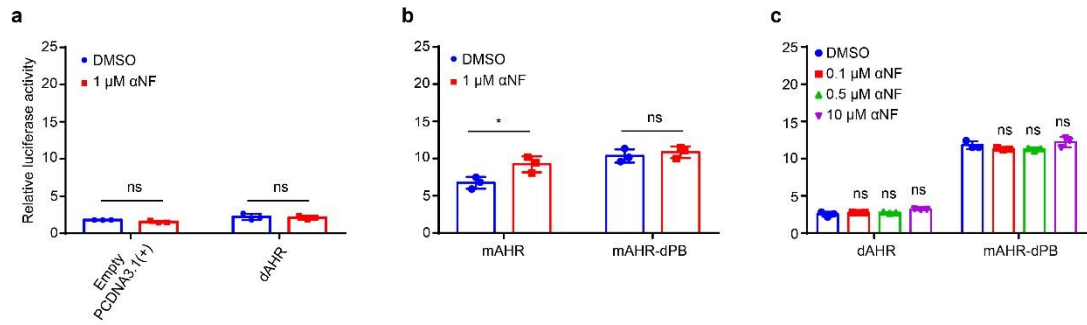

**Supplementary Fig. 2 Luciferase gene reporter assays performed for dAHR and mAHR-dPB. a** dAHR shows little or no transcriptional activity in HEK293T cells. **b** mAHR-dPB has a higher basal activity than mAHR, and the presence of  $\alpha$ NF does not impact its transcriptional activation. **c** Different concentrations of  $\alpha$ NF have no impact on the activity of mAHR-dPB or dAHR.  $n = 3$  biological repeats for each group. Data are shown as mean  $\pm$  SD.  $p$ -values were calculated using a two-way ANOVA with Tukey's multiple comparisons test and presented in the Source Data file. \*:  $p < 0.05$ , ns: not statistically significant ( $p > 0.05$ ). Source data are provided as a Source Data file.

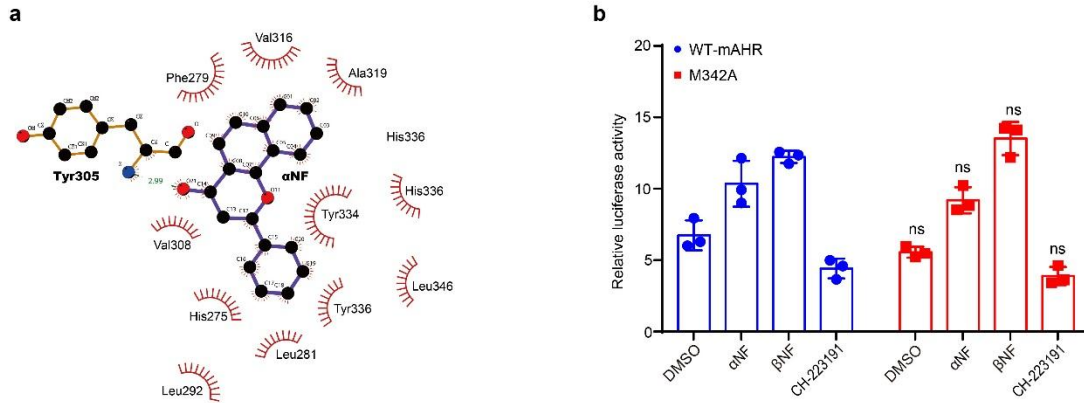

**Supplementary Fig. 3 The binding of  $\alpha$ NF to AHR PAS-B. a** LigPlot representation of the interactions between  $\alpha$ NF and dAHR PAS-B. **b** DRE luciferase reporter assay examining the effect of the M342A mutation on the transactivation of full-length mAHR in 293T cells. The ligands  $\beta$ NF (agonist),  $\alpha$ NF (partial agonist) and CH-223191 (antagonist) were supplied at 500 nM, 1  $\mu$ M and 1  $\mu$ M, respectively.  $n = 3$  biological repeats for each group. Data are shown as mean  $\pm$  SD.  $p$  values were calculated using a multiple two-sided  $t$  test with the WT mAHR group treated by the same ligand as a control and presented in the Source Data file. ns: not statistically significant ( $p > 0.05$ ). Source data are provided as a Source Data file.

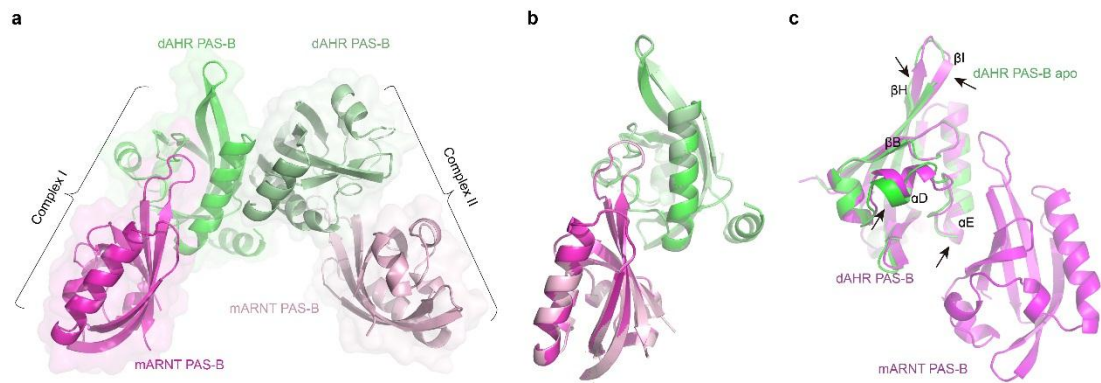

**Supplementary Fig. 4 Crystal structure of dAHR PAS-B:mARNT complex.** **a** The asymmetric unit of the complex crystal. **b** Superimposition of the two heterodimer complexes (complex I and complex II) in the ASU. **c** Comparison of apo (green) and ARNT-bound (magenta) dAHR PAS-B structures. Conformational differences are indicated by black arrows.

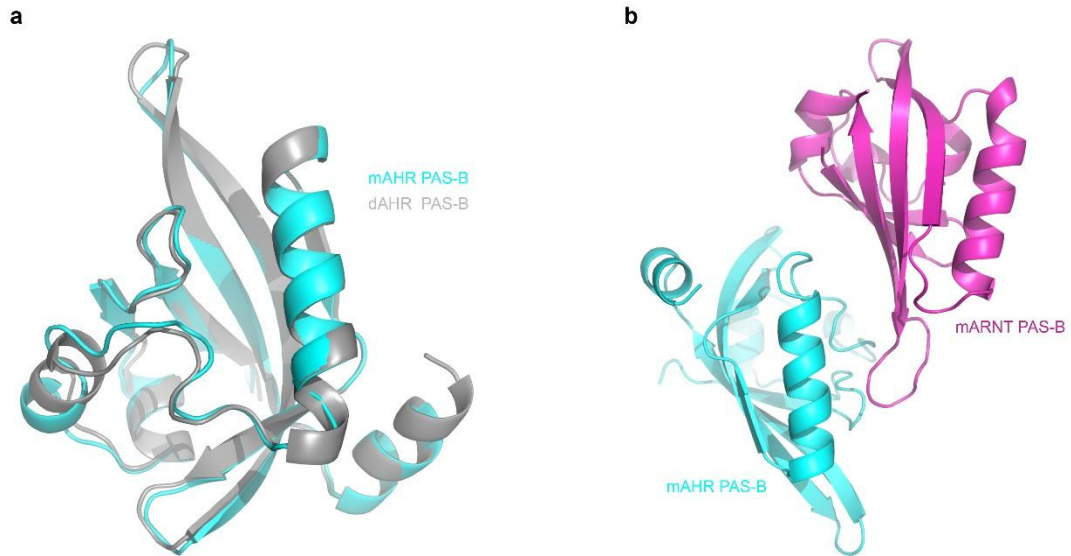

**Supplementary Fig. 5 Structure model mAHR PAS-B and ARNT PAS-B heterodimer.** **a** mAHR PAS-B model (cyan). The model was generated by the program Modeller with apo dAHR PAS-B structure (gray) used as the single template. **b** mAHR-ARNT PAS-B heterodimer model. The model was generated by roughly overlaying the mAHR PAS-B onto the dAHR PAS-B:mARNT structure.

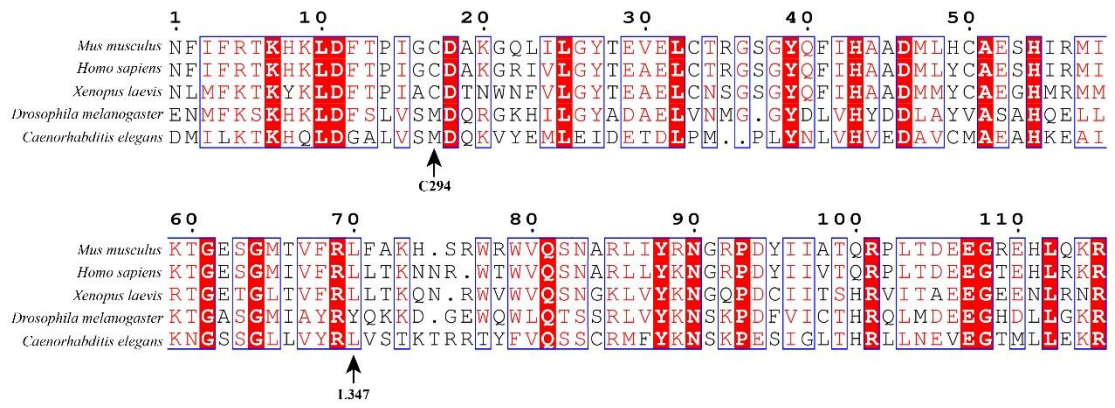

**Supplementary Fig. 6 Multiple sequence alignment of AHR PAS-B domains from different species.**

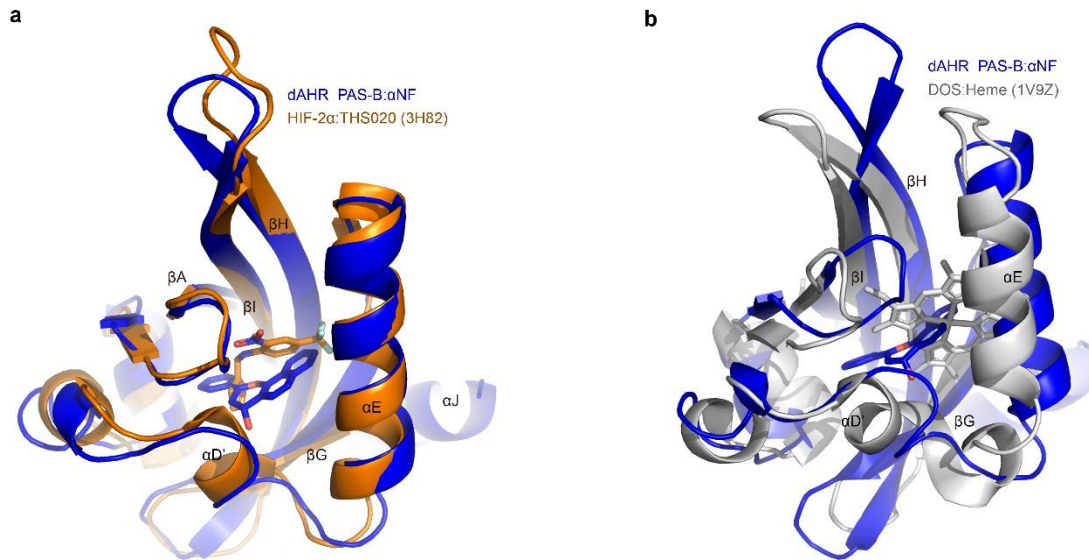

**Supplementary Fig. 7 Ligand binding positions of different PAS proteins. a** Comparison of ligand binding poses of dAHR (blue) and human HIF-2 $\alpha$  (orange, PDB code 3H82). **b** Ligand binding poses of dAHR and *Escherichia coli* DOS (grey, PDB code 1V9Z).



**Supplementary Table 1 Data collection and refinement statistics.**

|                           | dAHR PAS-B apo                                | dAHR PAS-B:αNF                   | dAHR PAS-B:ARNT           |
|---------------------------|-----------------------------------------------|----------------------------------|---------------------------|
| <b>Data collection</b>    |                                               |                                  |                           |
| Resolution (Å)            | 31.6-2.6 (2.7-2.6)                            | 30.2-2.4 (2.5-2.4)               | 44.16-2.0 (2.1-2.0)       |
| Wavelength (Å)            | 1.58                                          | 0.975                            | 0.975                     |
| Space group               | P2 <sub>1</sub> 2 <sub>1</sub> 2 <sub>1</sub> | P4 <sub>1</sub> 2 <sub>1</sub> 2 | C2 <sub>1</sub>           |
| a, b, c (Å)               | 34.3, 46.8, 81.7                              | 60.2, 60.2, 121.0                | 136.0, 55.6, 77.1         |
| α, β, γ (°)               | 90, 90, 90                                    | 90, 90, 90                       | 90, 103.1, 90             |
| Unique reflections        | 4172 (255)                                    | 9195 (851)                       | 36452 (3021)              |
| Redundancy                | 10.7 (2.2)                                    | 23.2 (16.1)                      | 6.8 (6.1)                 |
| Completeness (%)          | 95.1 (55)                                     | 99.9 (99.8)                      | 96.8 (96.3)               |
| Mean I/sigma (I)          | 17.7 (1.4)                                    | 16.3 (2.4)                       | 16.5 (2.6)                |
| <b>Refinement</b>         |                                               |                                  |                           |
| R-work / R-free           | 0.21 (0.23) / 0.26 (0.29)                     | 0.23 (0.31) / 0.27 (0.36)        | 0.18 (0.23) / 0.22 (0.28) |
| NO. of non-hydrogen atoms | 915                                           | 1896                             | 3990                      |
| Macromolecules            | 904                                           | 1806                             | 3554                      |
| Ligands                   | 0                                             | 42                               | 0                         |
| Solvent                   | 11                                            | 48                               | 436                       |
| Protein residues          | 114                                           | 226                              | 432                       |
| RMS (bonds)               | 0.007                                         | 0.004                            | 0.006                     |
| RMS (angles)              | 0.51                                          | 0.70                             | 0.83                      |
| Clash score               | 6.8                                           | 5.6                              | 10.1                      |
| Ramachandran favored (%)  | 98                                            | 97                               | 97                        |
| Ramachandran outliers (%) | 1.8                                           | 0                                | 2.8                       |
| Rotamer outliers (%)      | 2.2                                           | 1.1                              | 2.8                       |
| Average B-factor          | 38.5                                          | 44.1                             | 31.8                      |
